# Supplementary material for: Safety and Immunogenicity of Pertussis Vaccine Immunization during Pregnancy: A Meta-Analysis of Randomized Clinical Trials
Source: J Trop Med. 2022 Dec 21;2022:4857872. doi: 10.1155/2022/4857872 (PMC9797314; doi:10.1155/2022/4857872)
Supplement: Supplementary Materials — Supplementary File 1. Table S1. Risk of bias assessment of each included study. Supplementary File 2. Supplementary figure 3. Begg's funnel plots and Egger's plots. Supplementary File 3. Figure S2. Forest plots of GMCs of pertussis antibodies before and after primary vaccination. [file 4857872.f1.zip]

Archive with 4 entries (4 files):
- Supplementary description.docx
- Supplementary File1.docx
- Supplementary File2 (1).docx
- Supplementary File3 (1).docx
